# Supplementary material for: Dielectric barrier discharge plasma grafting carboxylate groups on Pt/Al2O3 catalysts for highly efficient hydrogen release from perhydro-dibenzyltoluene
Source: Royal Society of Chemistry journal article supplement (doi:10.1039/d1cy01652k), 2022-01-01
Supplement: d1cy01652k1.pdf [file d1cy01652k1.pdf]

## Supporting information

# Dielectric barrier discharge plasma grafting carboxylate groups on Pt/Al<sub>2</sub>O<sub>3</sub> catalysts for highly efficient hydrogen release from perhydro-dibenzyltoluene

Libin Shi <sup>a,b</sup>, Yiming Zhou <sup>a</sup>, Xiao Tan <sup>a</sup>, Suitao Qi <sup>a,\*</sup>, Kevin J. Smith <sup>b</sup>, Chunhai Yi <sup>a</sup>, Bolun Yang <sup>a</sup>, Shida Liu <sup>b</sup>

*a Shaanxi Key Laboratory of Energy Chemical Process Intensification, School of Chemical Engineering and Technology, Xi'an Jiaotong University, Xi'an, Shaanxi, 710049, P.R. China*

*b Department of Chemical & Biological Engineering, University of British Columbia, 2360 East Mall, Vancouver, BC, V6T 1Z3, Canada*

\* Corresponding author

*E-mail:* [suitaoqi@mail.xjtu.edu.cn](mailto:suitaoqi@mail.xjtu.edu.cn) (S. Qi)

$$D_{Pt} = \frac{n_{CO} \times (1 + p_{bridge})}{n_{Pt}} \quad \text{Eq. (S1)}$$

$$r_H = \frac{n_H}{n_{Pt}} \quad \text{Eq. (S2)}$$

$$S_H = r_H - D_{Pt} \quad \text{Eq. (S3)}$$

*Where,  $n_{CO}$ :* the amount of CO adsorption (mol)

*$p_{bridge}$ :* the proportion of CO bridge adsorption measured by CO-DRIFT in Table 2.

*$n_{Pt}$ :* the total amount of Pt (mol).

$n_H$ : the mole of adsorbed hydrogen atom

$S_H$ : hydrogen spillover capacity”

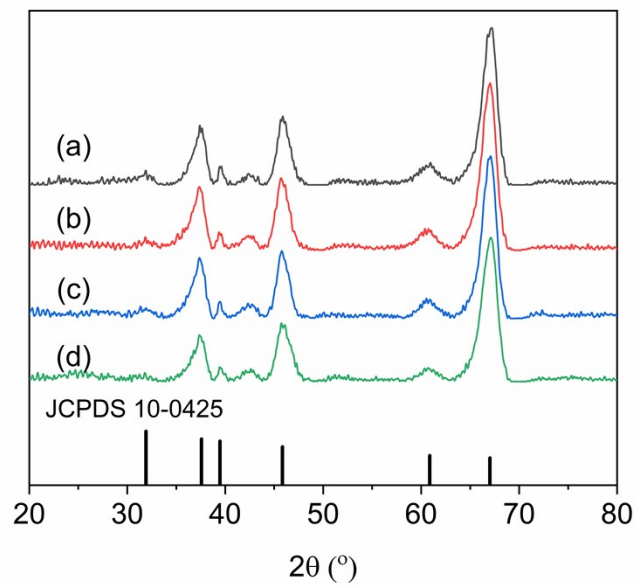

**Fig. S1** XRD patterns of (a)  $\text{Al}_2\text{O}_3$ ; (b)  $\text{Al}_2\text{O}_3$ -P-Ar; (c)  $\text{Al}_2\text{O}_3$ -P- $\text{CH}_4$ ; (d)  $\text{Al}_2\text{O}_3$ -P-HAc and JCPDS 10-0425 ( $\gamma$ - $\text{Al}_2\text{O}_3$ )

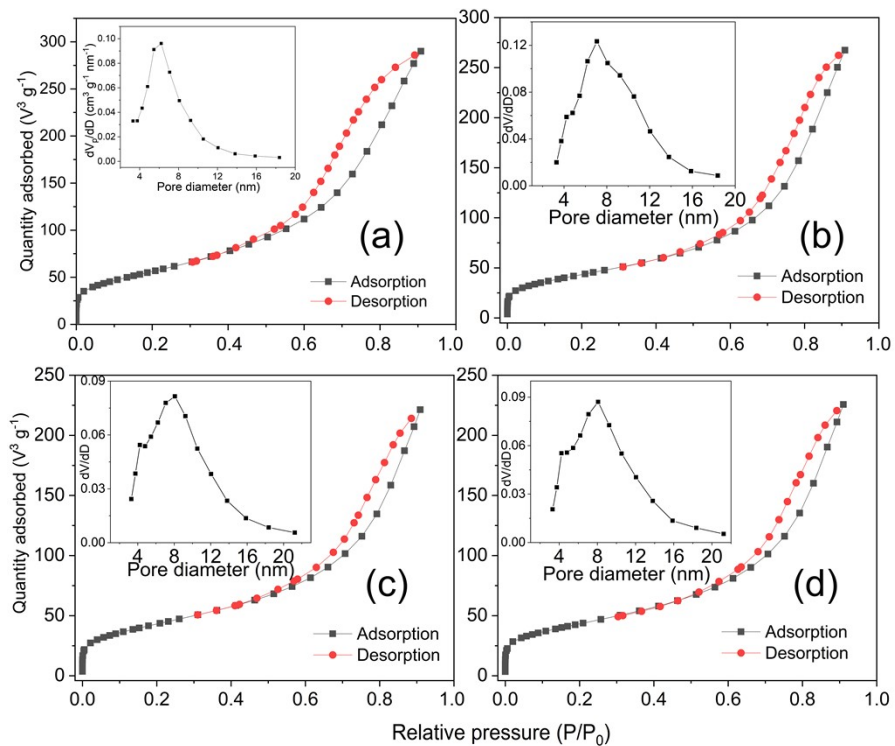

**Fig. S2** The  $N_2$  adsorption-desorption isotherms and pore distribution (a)  $Al_2O_3$ ; (b)  $Al_2O_3$ -P-Ar; (c)  $Al_2O_3$ -P- $CH_4$ ; (d)  $Al_2O_3$ -P-HAc

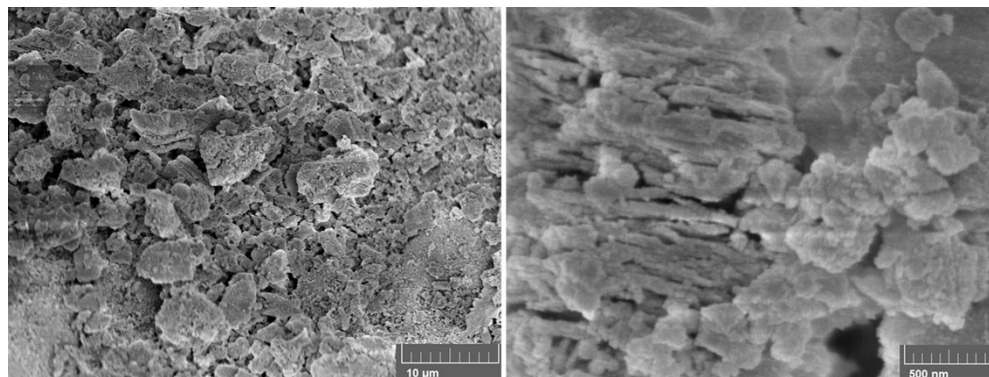

**Fig. S3** SEM characterization of  $Al_2O_3$ -P-Ar

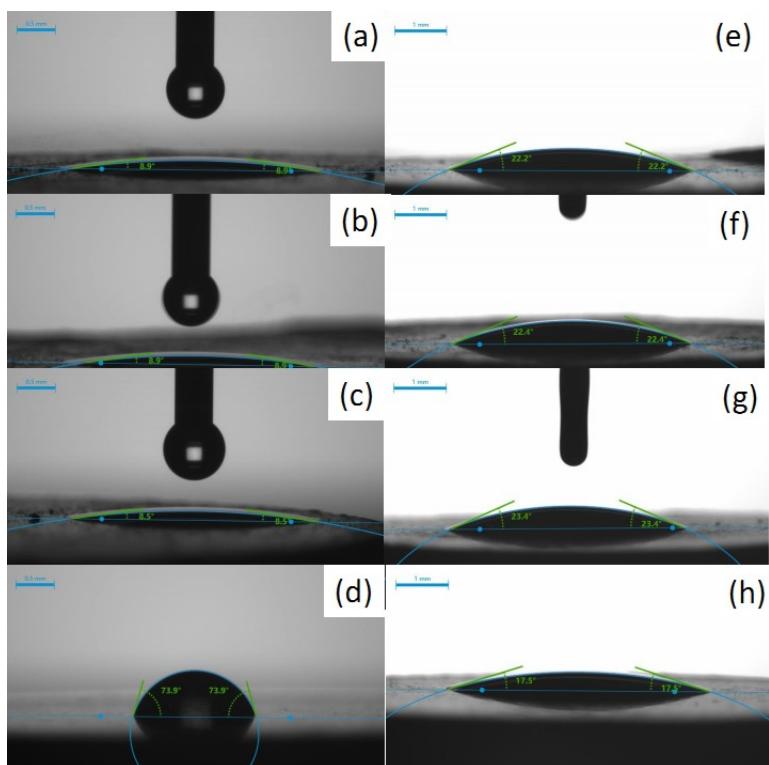

**Fig. S4** Contact angle of water and DBT: (a)H<sub>2</sub>O on Al<sub>2</sub>O<sub>3</sub>; (b)H<sub>2</sub>O on Al<sub>2</sub>O<sub>3</sub>-P-Ar; (c) H<sub>2</sub>O on Al<sub>2</sub>O<sub>3</sub>-P-CH<sub>4</sub>; (d) H<sub>2</sub>O on Al<sub>2</sub>O<sub>3</sub>-P-HAc; (e) DBT on Al<sub>2</sub>O<sub>3</sub>; (f) DBT on Al<sub>2</sub>O<sub>3</sub>-P-Ar; (g) DBT on Al<sub>2</sub>O<sub>3</sub>-P-CH<sub>4</sub> ;(h) DBT on Al<sub>2</sub>O<sub>3</sub>-P-HAc

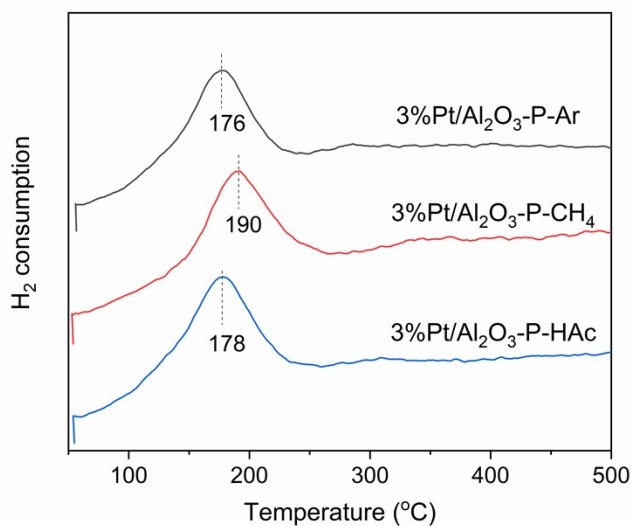

**Fig. S5** TPR results of different catalysts

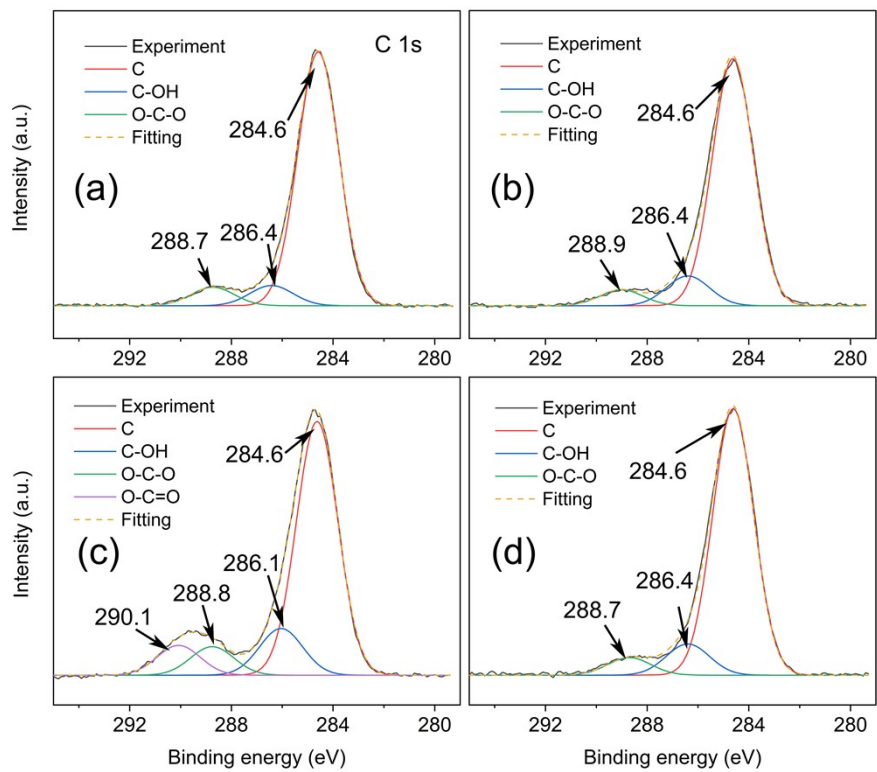

**Fig. S6** XPS C 1s spectra of (a) 3% Pt/Al<sub>2</sub>O<sub>3</sub>-P-Ar; (b) 3% Pt/Al<sub>2</sub>O<sub>3</sub>-P-CH<sub>4</sub>; (c) 3% Pt/Al<sub>2</sub>O<sub>3</sub>-P-HAc; and (d) 3% Pt/Al<sub>2</sub>O<sub>3</sub>-P-SO<sub>2</sub>-Pt.

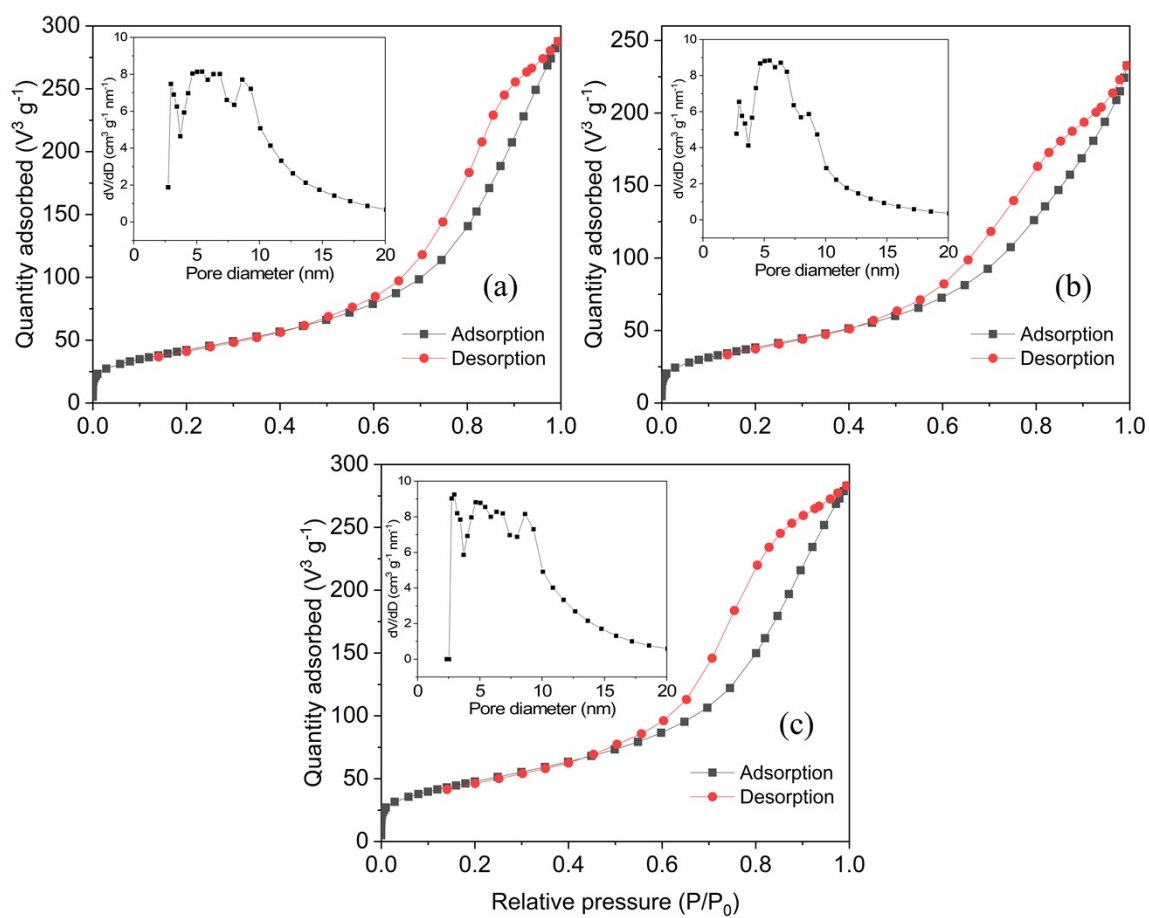

**Fig. S7** The  $N_2$  adsorption–desorption isotherms and pore distribution (a) 3% Pt/ $Al_2O_3$ -P-Ar(R); (b) 3% Pt/ $Al_2O_3$ -P- $CH_4$ (R); (c) 3% Pt/ $Al_2O_3$ -P-HAc(R)
